# Supplementary material for: Bright violet-to-aqua-emitting cadmium-free Ag-doped Zn–Ga–S quantum dots with high stability
Source: Royal Society of Chemistry journal article supplement (doi:10.1039/c8cc01293h), 2018-01-01
Supplement: c8cc01293h1.pdf [file c8cc01293h1.pdf]

## Electronic Supplementary Information

Bright violet-to-aqua-emitting cadmium-free Ag-doped Zn–Ga–S quantum dots with high stability

Wen-Jin Zhang,<sup>a</sup> Chun-Yang Pan,<sup>\*a</sup> Fan Cao,<sup>b</sup> Haoran Wang,<sup>b</sup> and Xuyong Yang<sup>\*b</sup>

<sup>a</sup>School of Light Industry and Chemical Engineering, Guangdong University of Technology, Guangzhou 510006,  
China

<sup>b</sup>Key Laboratory of Advanced Display and System Applications, Education of Ministry, Shanghai University, 149  
Yanchang Road, 200072, P. R. China

Email: panchuny@gdut.edu.cn; Tel /Fax: +86 20 39322231

**Materials.** Silveracetate (AgOAc, 99.99%), indium acetate (In(OAc)<sub>3</sub>, 99.99%), gallium acetylacetonate (Ga(acac)<sub>3</sub>, 99.99%), zinc acetate dihydrate (Zn(OAc)<sub>2</sub>·2H<sub>2</sub>O, 99%), sulfur powder (99.99%), 1-dodecanethiol (DDT, 98%), 1-octadecene (ODE, 90%), oleic acid (OA, 90%) and 11-mercaptoundecanoic acid (MUA, 95%) were obtained from Sigma-Aldrich and used without further purification.

**Synthesis of Ag: Zn-Ga-S and Ag: Zn-Ga-S/ZnS QDs.** Core QDs were synthesized via a typically facile one-pot non-injection approach, mixing AgOAc (3.3mg, 0.02mmol), Zn(OAc)<sub>2</sub>·2H<sub>2</sub>O (44.0 mg, 0.2 mmol), Ga(acac)<sub>3</sub> (73.4 mg, 0.2mmol), and sulfur powder (25.6 mg, 0.8 mmol) together with 2.0 mL of DDT, 6.0 mL of OA and 12.0 mL of ODE in a 100 mL three-flask at room temperature. Then the mixture was heated up to 100 °C with degassing, followed by annealing at 240 °C for 30 min to obtain the Ag: Zn-Ga-S core QDs. Aliquots of the sample were taken at different time intervals and injected into toluene solvent to record their optical spectra. Whereafter, the reaction mixture was cooled to 60 °C and dispersed into toluene, and methanol was added thereafter for purification via repeated centrifugation and decantation. Other Ag: Zn-Ga-S core QDs were prepared simply by varying other experimental variables.

For the preparation of Ag: Zn-Ga-S/ZnS core/shell QDs with injection of the Zn precursor once (4 mmol), the as-prepared Zn precursor solution consisting of 88.0 mg of  $\text{Zn}(\text{OAc})_2 \cdot 2\text{H}_2\text{O}$  (0.4 mmol), 0.3 mL of OA and 0.7 mL of ODE dissolved at 280 °C was further injected into the core crude solution when it cooled to 100 °C, followed by annealing at 240 °C for 20 min to grow the ZnS shell upon the Ag: Zn-Ga-S core QDs. For the preparation of Ag: Zn-Ga-S/ZnS QDs with injection of the Zn precursor twice (8 mmol), another 4 mmol of Zn precursor was injected into the previous core/shell QDs solution when the mixture solution was cooled to 100 °C and then grew at 240 °C for 20 min. Further purification of Ag: Zn-Ga-S/ZnS QDs was analogous to that of Ag: Zn-Ga-S QDs as aforementioned. Water solubilization of the initially oil-soluble Ag:Zn-Ga-S/ZnS QDs was performed by ligand exchange, replacing their initial hydrophobic surfactants with hydrophilous ligand MUA according to the previous literature methods.<sup>1</sup>

**Characterization.** UV-vis spectra were obtained on a UV-visible spectrophotometer (Shimadzu UV-3101 PC). PL spectra were recorded on a fluorescence spectrophotometer (Cary Eclipse Varian). The PL QY of the as-obtained QDs were assessed by the integrated emission of the QDs samples in solution in comparison to that of standard organic dye (9,10-diphenylanthracene) with a PL QY of 91% in ethanol with identical optical density.<sup>2</sup> Transmission electron microscopy (TEM) pictures were achieved on a JEOL JEM-2100 transmission electron microscope by using wide-angle X-ray diffraction. X-ray diffraction (XRD) spectra were measured on a Siemens D5005 X-ray Powder diffractometer using a graphite monochromatized  $\text{Cu K}\alpha$  as the radiation source. The composition of the QDs samples were performed through Thermo Fisher Scientific ESCALAB 250Xi XPS System.

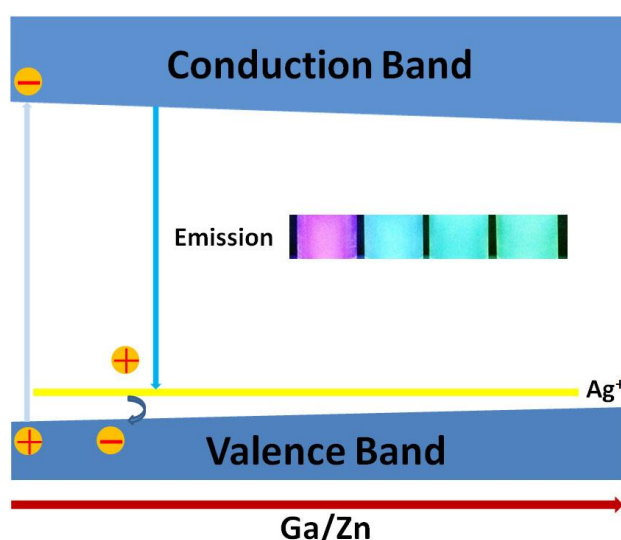

**Fig. S1** The mechanism schematic of  $\text{Ag}^+$  energy state in the composition variable alloyed QDs and the recombination mechanism.

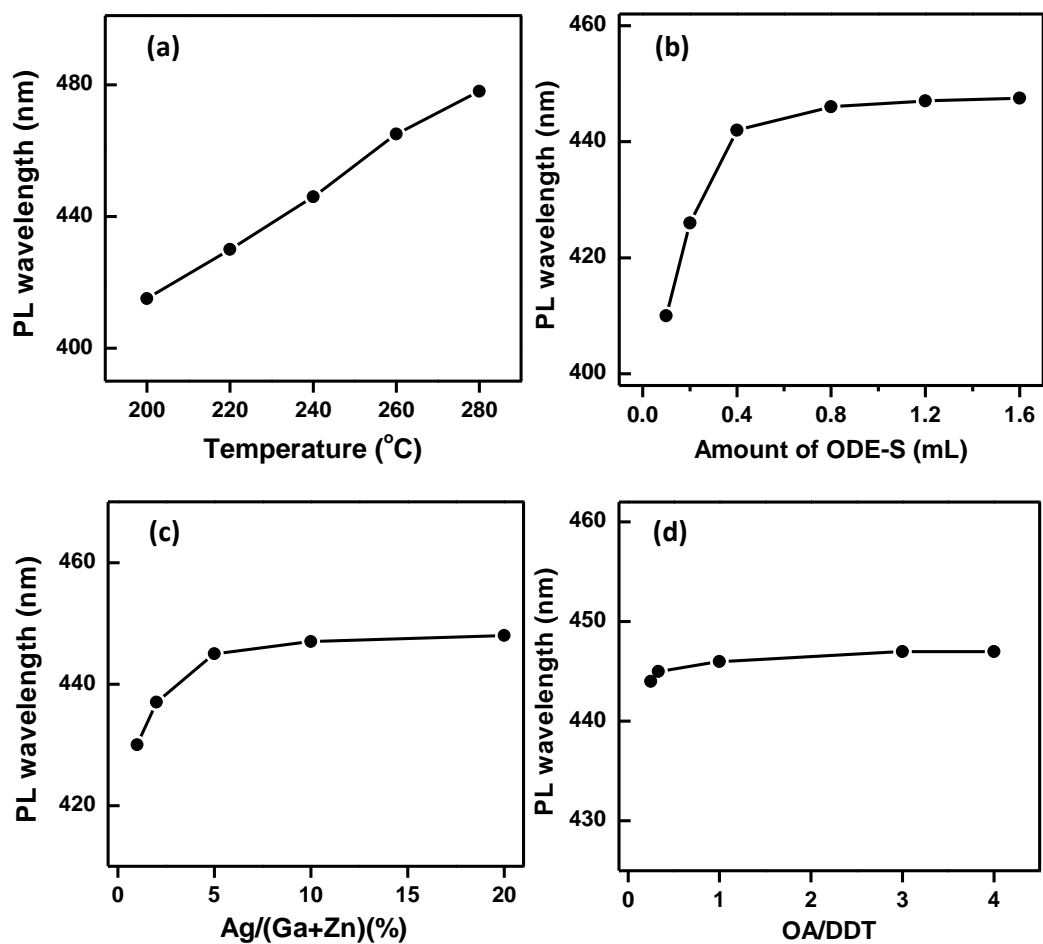

**Fig. S2** Summarization of the dependence of PL peak position on the (a) reaction temperature (b) amounts of elementary sulfur (c) Ag dopant concentrations (d) OA/DDT ratios.

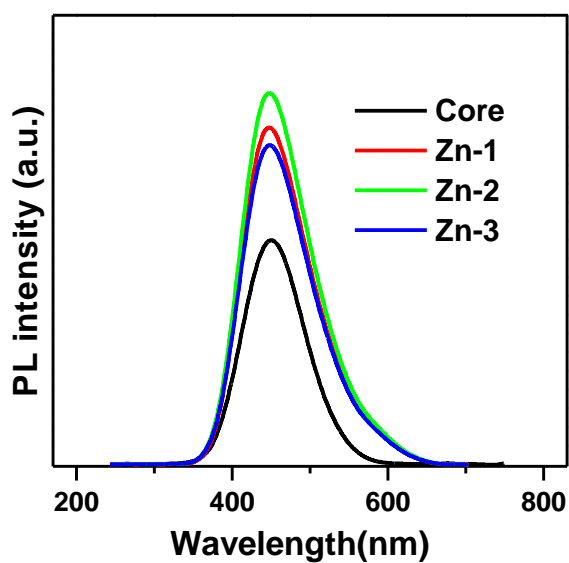

**Fig. S3** PL emission spectra of Ag: Zn-Ga-S core QDs, Ag: Zn-Ga-S/ZnS core/shell QDs with injection of Zn precursor once, twice and thrice, respectively.

**Tab. S1** atomic % of the elements determined from XPS analysis (mean values of 5 independent measurements per sample) for samples with different thickness of ZnS shell.

| QDs Samples | S   | Zn    | Ag   | Ga    |
|-------------|-----|-------|------|-------|
| Core        | 100 | 12.47 | 1.25 | 23.94 |
| Core shell  | 100 | 68.49 | 1.14 | 20.18 |

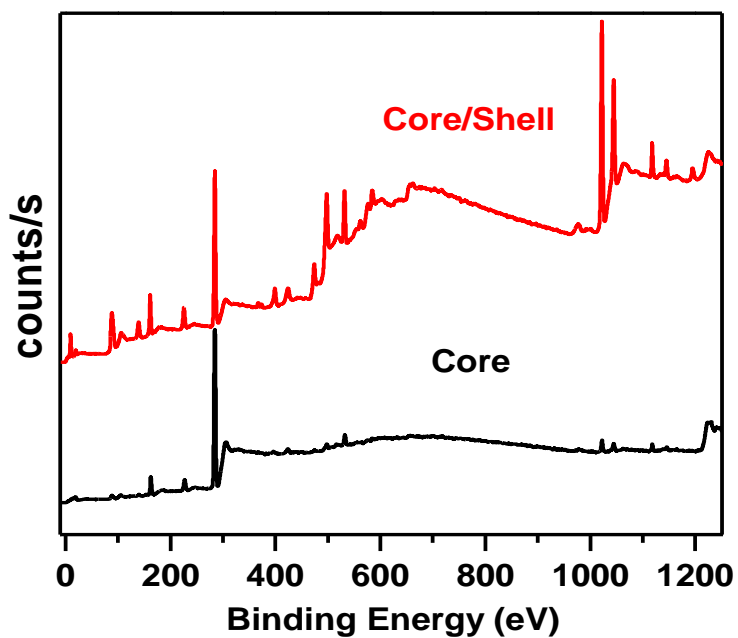

**Fig. S4** XPS spectra of Ag: Zn-Ga-S core (black line) and Ag: Zn-Ga-S/ZnS core/shell QDs samples (red line).

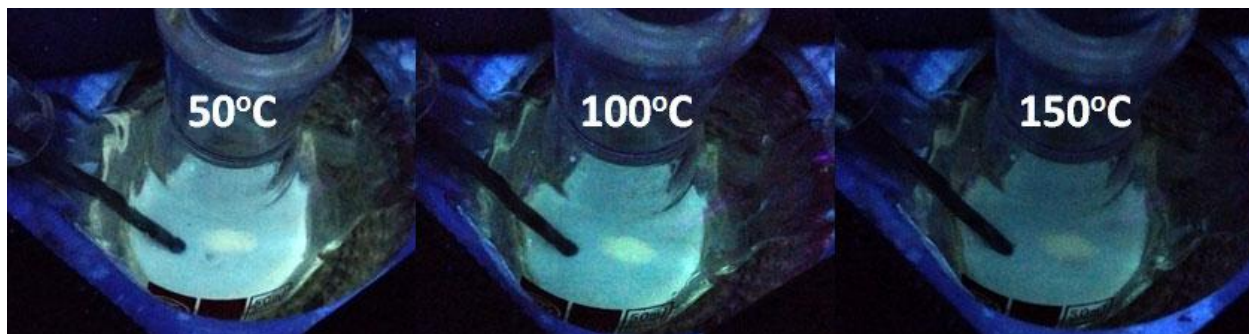

**Fig. S5** Digital pictures of Ag: Zn-Ga-S QDs under different heating temperature from 50 to 150 °C under illumination of a UV lamp at 365 nm.

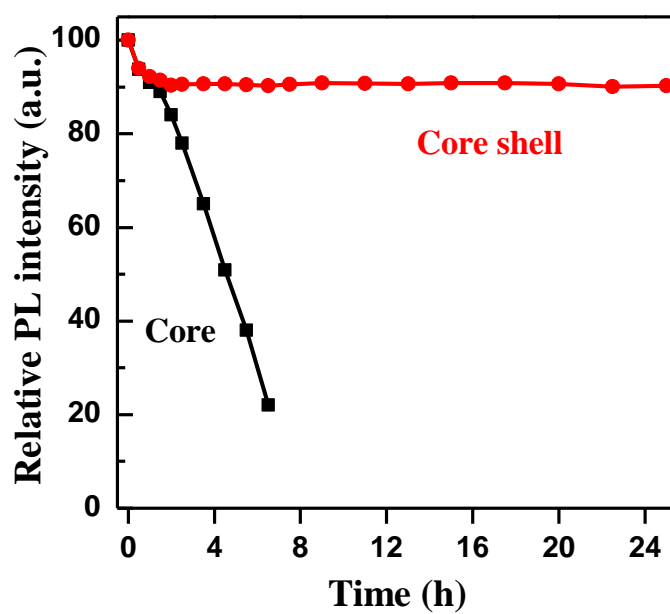

**Fig. S6** Temporal evolution of the relative PL intensity of core Ag: Zn-Ga-S and core/shell Ag: Zn-Ga-S/ZnS QDs samples.

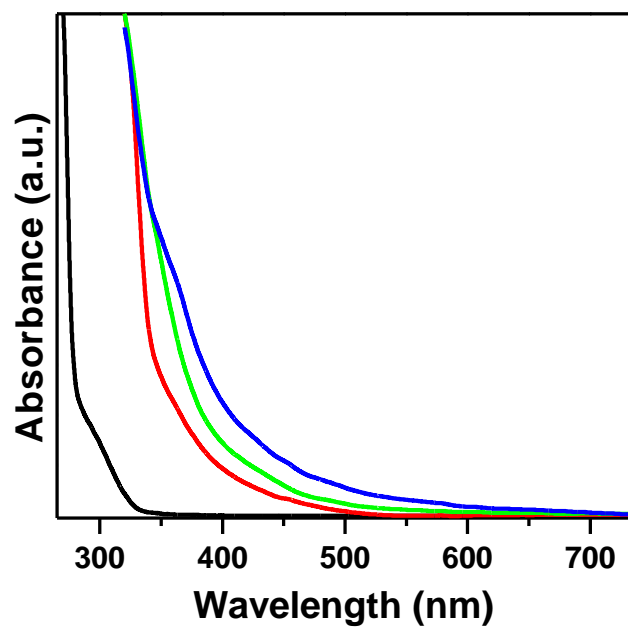

**Fig. S7** UV-vis absorption spectrum of Ag: Zn-Ga-S/ZnS QDs under different Zn/Ga precursor ratios, Ag ion concentration and reaction temperature.

- 1 W. Zhang, Q. Lou, W. Ji, J. Zhao and X. Zhong, *Chem. Mater.*, 2014, **26**, 1204–1212.
- 2 J. Cho, Y. Jung, J.-K. Lee and H.-S. Jung, *Langmuir*, 2017, **33**, 3711–3719.
